# Supplementary material for: A facile strategy for the preparation of well-dispersed bimetal oxide CuFe2O4 nanoparticles supported on mesoporous silica
Source: Royal Society of Chemistry journal article supplement (doi:10.1039/c3ta10506g), 2013-01-01
Supplement: c3ta10506g.pdf [file c3ta10506g.pdf]

## Supporting Information

# A Facile Strategy for the Preparation of Well-Dispersed Bimetal Oxide $\text{CuFe}_2\text{O}_4$ Nanoparticles Supported on Mesoporous Silica

Bin Li,<sup>a</sup> Min Li,<sup>a</sup> Chaohua Yao,<sup>a</sup> Yifeng Shi,<sup>a\*</sup> Danru Ye,<sup>a</sup> Jing Wu,<sup>a\*</sup> Dongyuan Zhao<sup>b</sup>

<sup>a</sup> College of Material, Chemistry and Chemical Engineering, Hangzhou Normal University, Hangzhou 310036, China

<sup>b</sup> Department of Chemistry, Fudan University, Shanghai, 200433, China

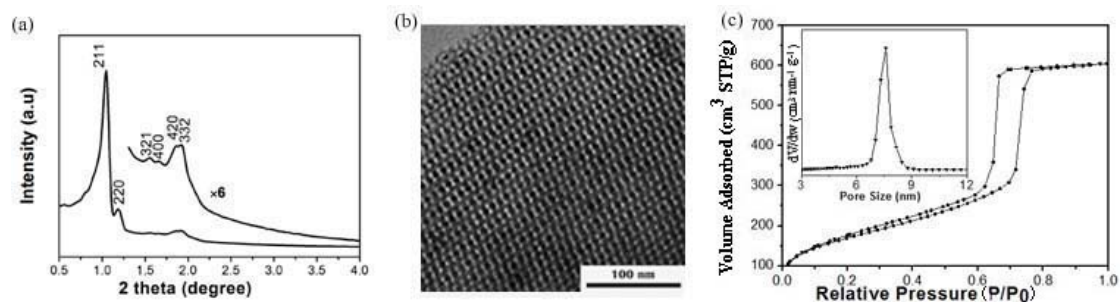

**Figure S1.** (a) Small angle XRD pattern, (b) TEM image, (c) Nitrogen sorption isotherms, and (c inset) its corresponding pore size distribution curve of the mesoporous silica KIT-6 support.

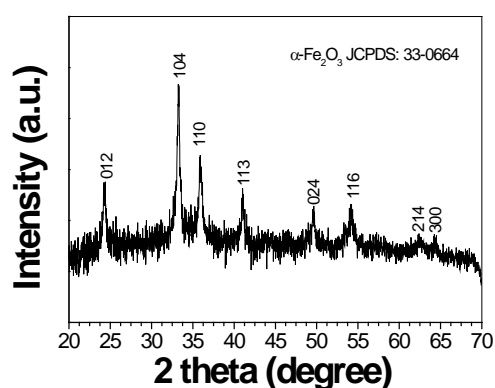

**Figure S2.** XRD pattern of the red powder form precipitate collected from the homogeneous mixture of iron nitrate and copper nitrate after being heated at 150 °C for 2 h. This result confirms that crystalline  $\alpha\text{-Fe}_2\text{O}_3$  can be directly formed from the solution of homogeneously mixed iron and copper nitrate precursors.

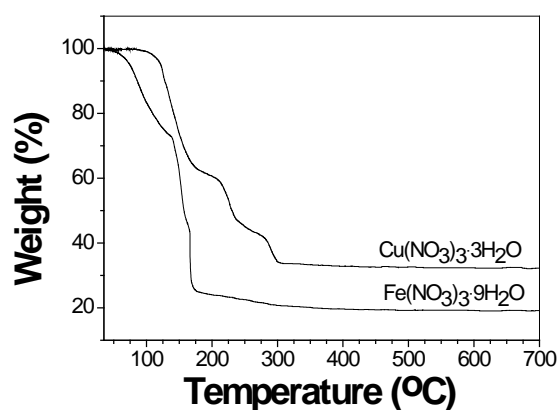

**Figure S3.** TGA curves of  $\text{Fe}(\text{NO}_3)_3 \cdot 9\text{H}_2\text{O}$  and  $\text{Cu}(\text{NO}_3)_2 \cdot 3\text{H}_2\text{O}$  recorded under air gas flow (40 mL/min) with a ramp of 15 °C/min. (7.594 mg  $\text{Fe}(\text{NO}_3)_3 \cdot 9\text{H}_2\text{O}$  and 8.208 mg  $\text{Cu}(\text{NO}_3)_2 \cdot 3\text{H}_2\text{O}$  were separately loaded in an open alumina crucible without any cover for TGA test.)

**Table S1.** The weight loss of  $\text{Cu}(\text{NO}_3)_2 \cdot 3\text{H}_2\text{O}$  and  $\text{Fe}(\text{NO}_3)_3 \cdot 9\text{H}_2\text{O}$  after drying at 100 °C for 24 h.

| Molecule formula                                     | Origin weight (g) | Weight loss (g) | Weight loss percent % | Theory percent of $\text{H}_2\text{O}$ % |
|------------------------------------------------------|-------------------|-----------------|-----------------------|------------------------------------------|
| $\text{Fe}(\text{NO}_3)_3 \cdot 9\text{H}_2\text{O}$ | 1.094             | 0.438           | 40                    | 40                                       |
| $\text{Cu}(\text{NO}_3)_2 \cdot 3\text{H}_2\text{O}$ | 0.849             | 0.209           | 24.6                  | 22.3                                     |

**Table S2.** Parameters of KIT-6 support and KIT-6 with  $\text{CuFe}_2\text{O}_4$  particles.

| Materials   | BET surface area ( $\text{m}^2 \text{g}^{-1}$ ) | Pore size (nm) | Pore Volume ( $\text{cm}^3 \text{g}^{-1}$ ) |
|-------------|-------------------------------------------------|----------------|---------------------------------------------|
| KIT-6       | 599                                             | 7.5            | 0.94                                        |
| 10% loading | 411                                             | 7.5            | 0.70                                        |
| 20% loading | 335                                             | 7.5            | 0.55                                        |
| 30% loading | 387                                             | 7.5            | 0.56                                        |

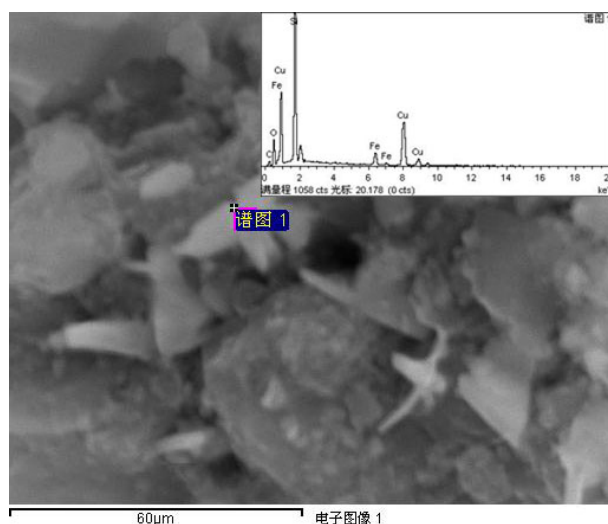

Figure S4. SEM image and EDX spectrum of Sample-W.

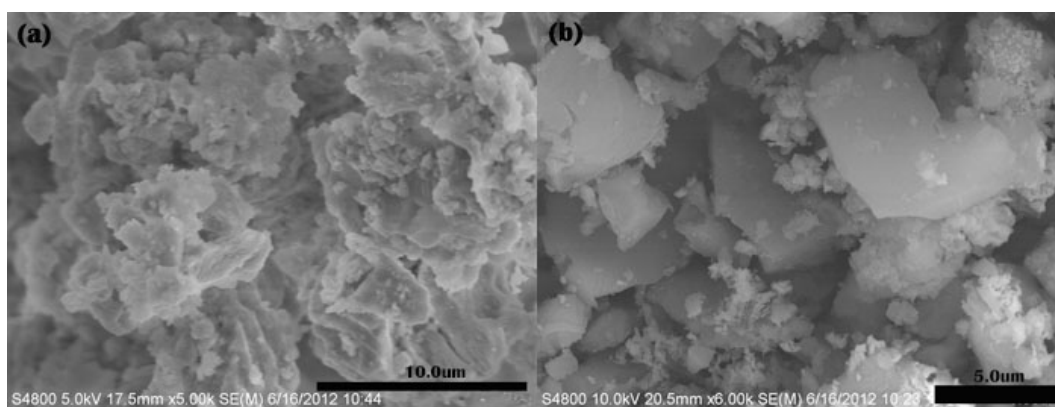

Figure S5. SEM images of the (a)  $\text{Fe}_2\text{O}_3$ @KIT-6 and (b)  $\text{CuO}$ @KIT-6 synthesized from  $\text{Fe}(\text{NO}_3)_3 \cdot 9\text{H}_2\text{O}$ @KIT-6 and  $\text{Cu}(\text{NO}_3)_2 \cdot 3\text{H}_2\text{O}$ @KIT-6, respectively.

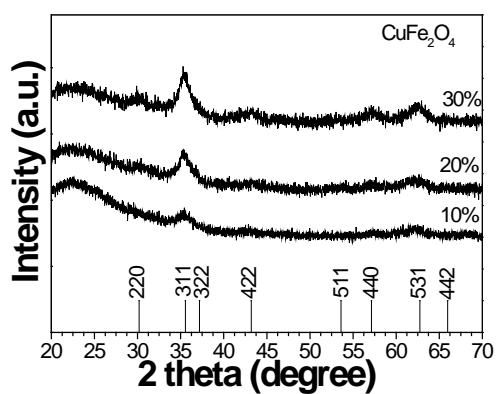

Figure S6. XRD patterns of  $\text{CuFe}_2\text{O}_4$  with different loading amount.

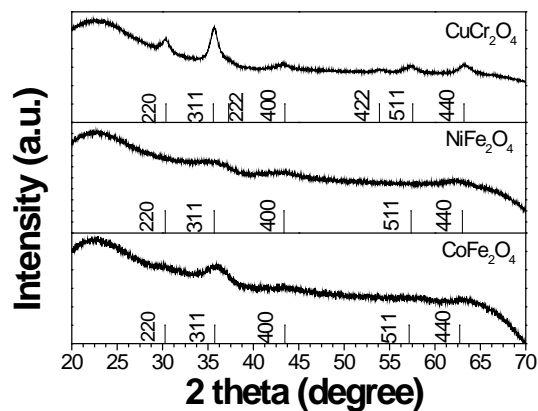

**Figure S7.** XRD patterns of different bimetallic oxide nanoparticles supported on the mesoporous silica ( $\text{CuCr}_2\text{O}_4$ : 26-0509,  $\text{NiFe}_2\text{O}_4$ : 74-2081 and  $\text{CoFe}_2\text{O}_4$ : 01-1121).

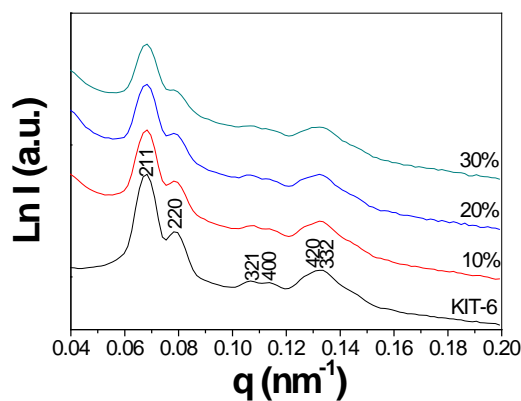

**Figure S8.** SAXS patterns of KIT-6 and  $\text{CuFe}_2\text{O}_4$ @KIT-6 with 10 ~ 30 % loading amount.

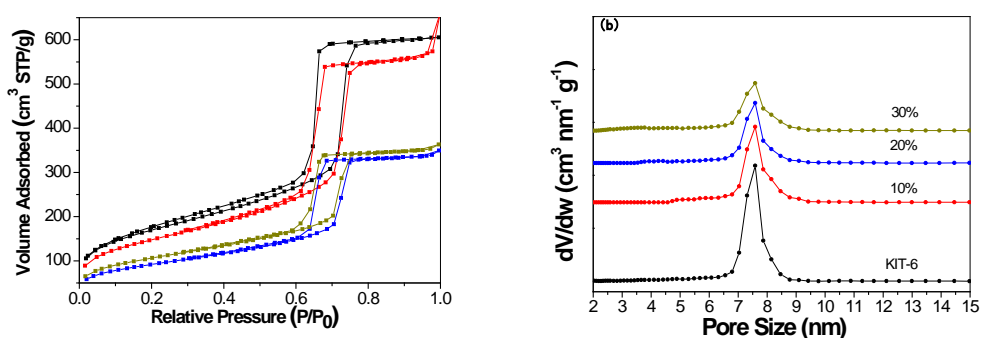

**Figure S9.** (a)  $\text{N}_2$  adsorption-desorption isotherms and (b) their corresponding pore size distribution curves of KIT-6 support and  $\text{CuFe}_2\text{O}_4$ @KIT-6 samples with different loading amounts. (black line: KIT-6, red line: 10%, blue line: 20%, dark yellow line: 30%).

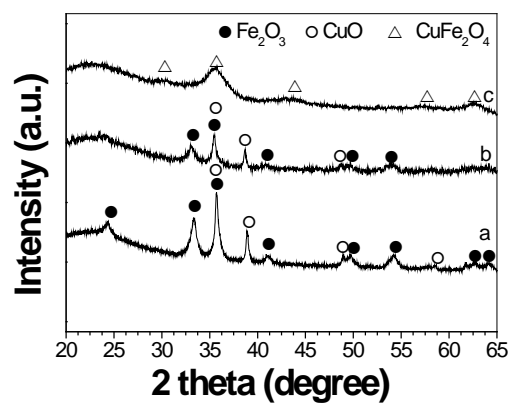

**Figure S10.** XRD patterns of Sample-W calcined in different conditions: (a) 3 g of nitrate@KIT-6 intermediate calcined inside a 5 mL crucible with a cover, (b) 3 g of nitrate@KIT-6 intermediate calcined inside a 5 mL crucible without cover, (c) 0.5 g of nitrate@KIT-6 intermediate calcined in a petri dish without cover.

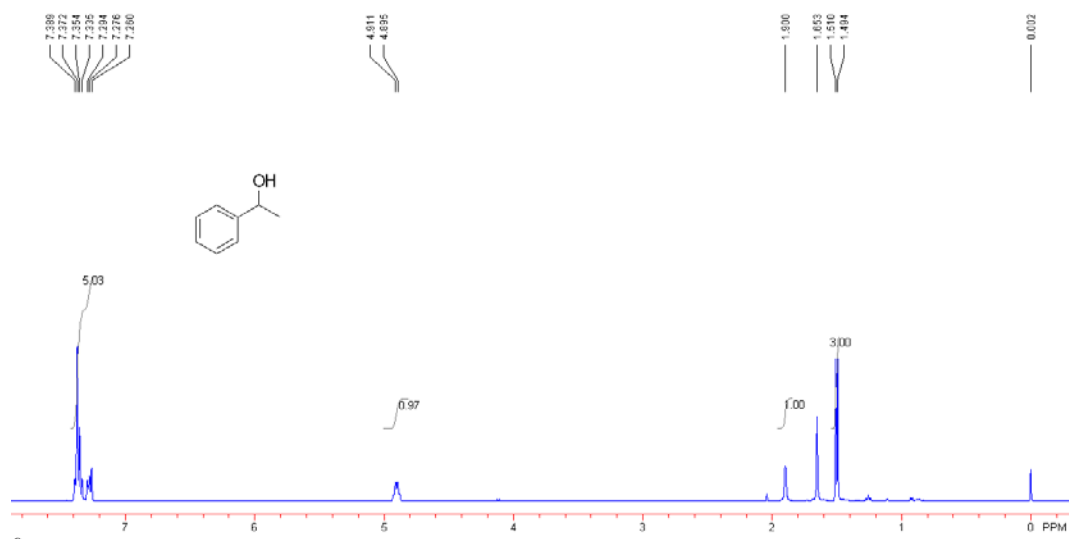

Figure S11.  $^1\text{H}$  NMR spectrum of (*S*)-1-phenylethanol.

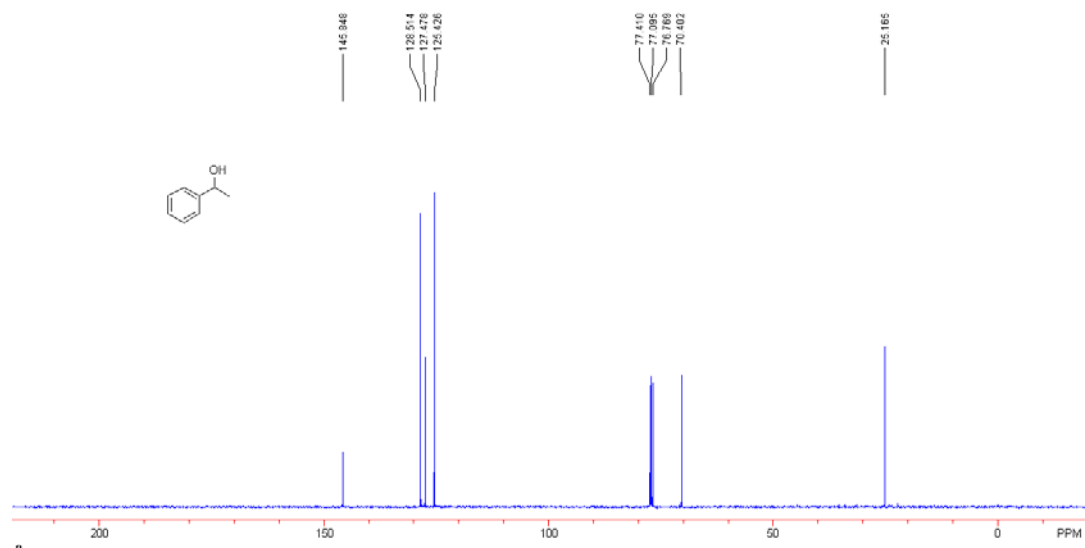

Figure S12.  $^{13}\text{C}$  NMR spectrum of (*S*)-1-phenylethanol.

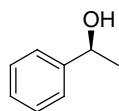

The conversion and ee value were determined by Capillary GC with a 25m × 0.25 mm Chirasil-DEX CB column (Varian, carrier gas, N<sub>2</sub>); 115 °C; isothermal;  $t_R$  (**1a**) = 4.62 min;  $t_R$  (*R*) = 10.16 min;  $t_R$  (*S*) = 11.17 min. Chromatograms are illustrated below for a 93% ee sample:

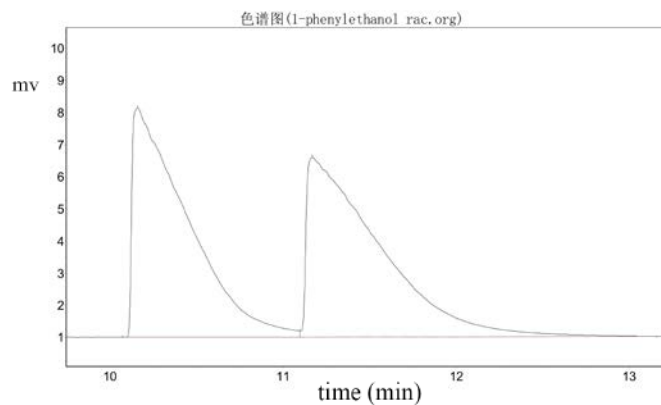

| Peak    | RetTime (min) | Height (mv) | Area (mv)  | Area (%) |
|---------|---------------|-------------|------------|----------|
| 1       | 10.160        | 7135.186    | 157569.375 | 49.1491  |
| 2       | 11.168        | 5587.702    | 163024.922 | 50.8508  |
| Totals: |               | 12722.888   | 320594.297 | 100.0000 |

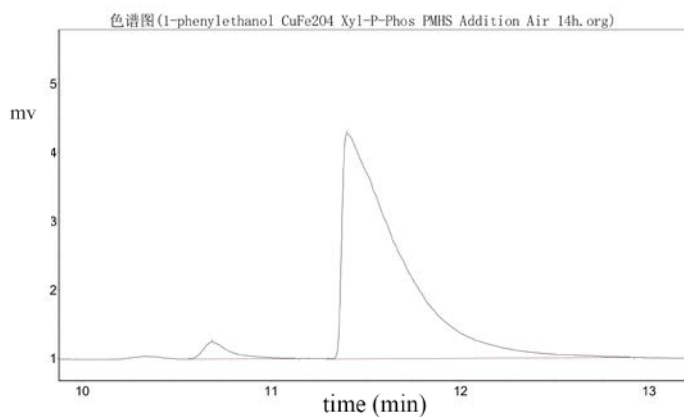

| Totals: | RetTime (min) | Height (mv) | Area (mv) | Area (%) |
|---------|---------------|-------------|-----------|----------|
| Totals: | 10.687        | 242.752     | 2460.502  | 3.4902   |
|         | 11.402        | 3276.666    | 68037.898 | 96.5098  |
| 总计      |               | 3519.418    | 70498.401 | 100.0000 |

Figure S13. GC spectra of (*S*)-1-phenylethanol.
